# Supplementary material
Source: PubMed Central journal article supplement (PMC218733)

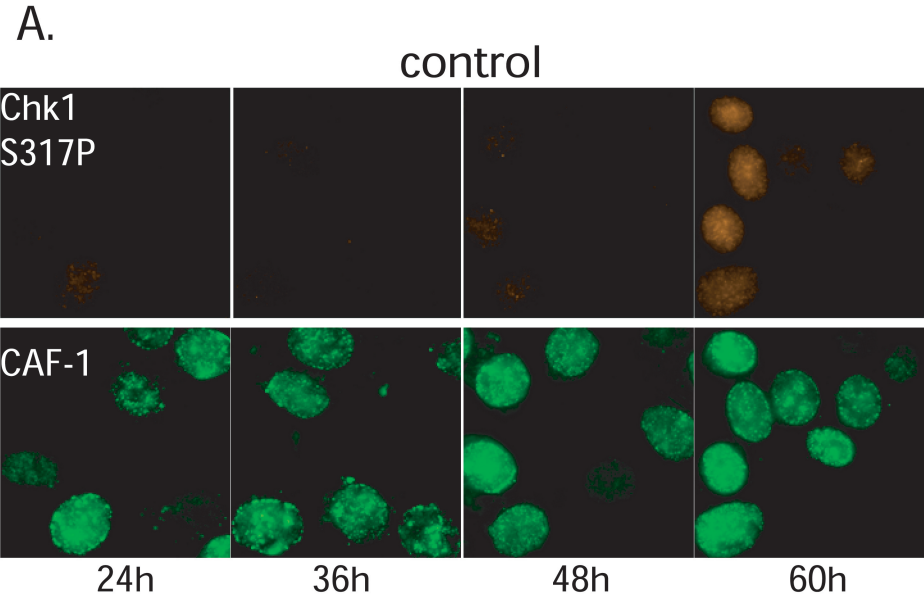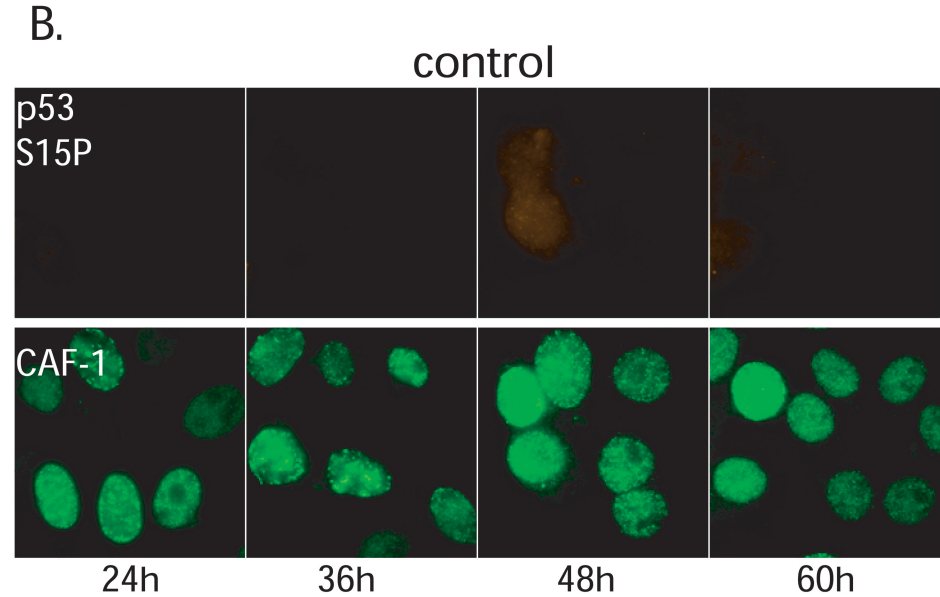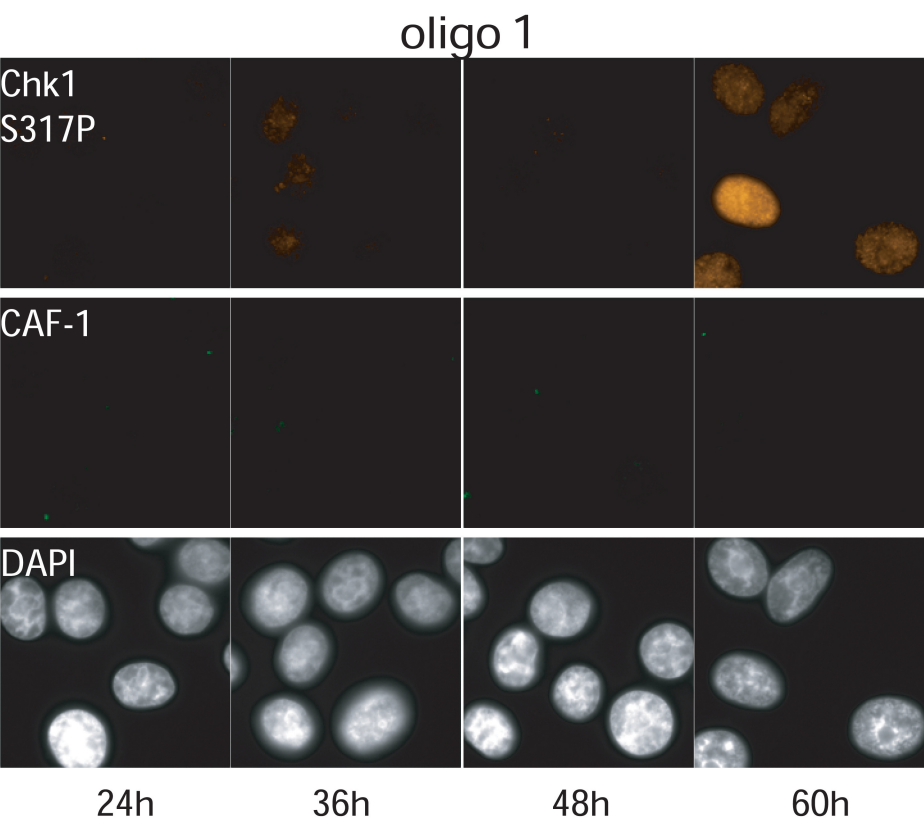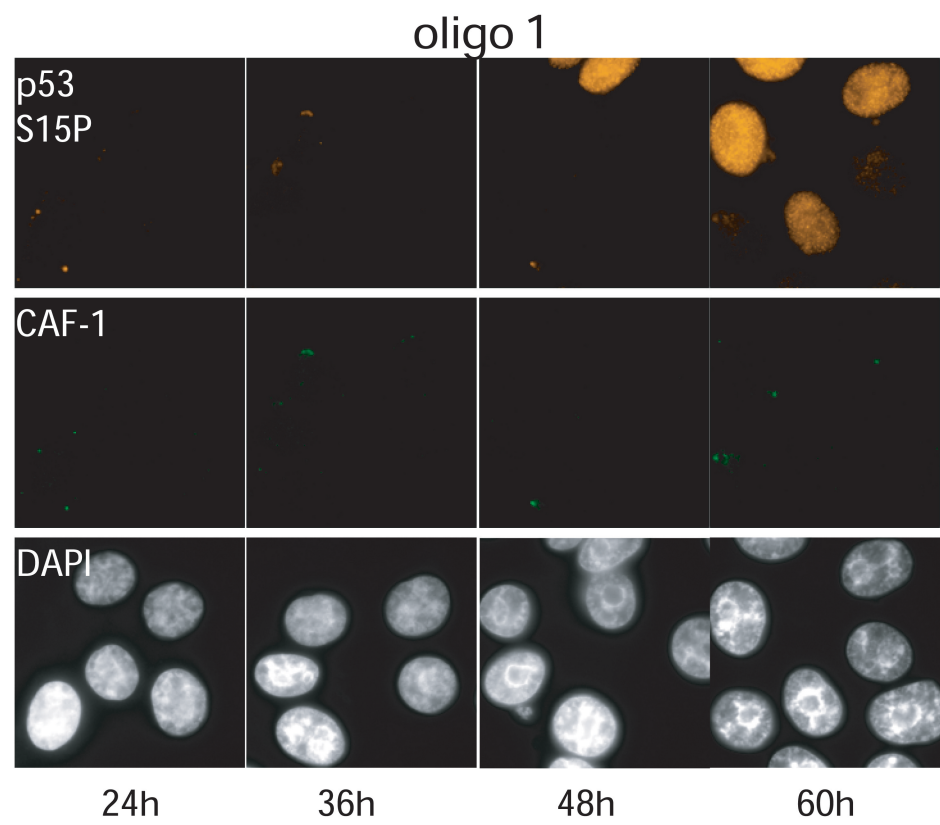

Supplement: pnas_1635158100_3.pdf [file pnas_1635158100_3.pdf]
